# Supplementary material for: Assessment of Awareness and Preparedness of Pennsylvania Veterinarians to Recognize and Respond to Foreign Animal Diseases
Source: publisher site journal article supplement (doi:10.1515/jhsem-2016-0007), 2016-07-01
Supplement: Supplementary file 1 [file Appendix_A.docx]

**Appendix A - Questionnaire**

PENNSYLVANIA FAD SURVEY - 2015

1. What is your gender?

Female

Male

2. What is your age category (in years)?

20-29

30-39

40-49

50-59

60-69

>70

3. How many years have you been practicing veterinary medicine?

<5

5-10

11-15

16-20

21-25

26-30

>30

4. What is your primary practice specialty? (**check only one**)

Small animal practice

Large animal practice

Equine practice

Mixed animal practice

Shelter practice

Zoo

Exotics

Laboratory animal

Scientific research

Regulatory Academia

Government

Other

5. In what other clinical areas do you practice? (**check all that apply**)

None

Small animal practice

Large animal practice

Equine practice

Mixed animal practice

Shelter practice

Zoo

Exotics

Laboratory animal

6. In which state(s) are you licensed? (**check all that apply**)

Alabama

Alaska

Arizona

Arkansas

California

Colorado

Connecticut

Delaware

District of Columbia

Florida

Georgia

Hawaii

Idaho

Illinois

Indiana

Iowa

Kansas

Kentucky

Louisiana

Maine

Maryland

Massachusetts

Michigan

Minnesota

Mississippi

Missouri

Montana

Nebraska

Nevada

New Hampshire

New Jersey

New Mexico

New York

North Carolina

North Dakota

Ohio

Oklahoma

Oregon

Pennsylvania

Rhode Island

South Carolina

South Dakota

Tennessee

Texas

Utah

Vermont

Virginia

Washington

West Virginia

Wisconsin

Wyoming

7. In which state(s) do you practice? (**check all that apply**)

Alabama

Alaska

Arizona

Arkansas

California

Colorado

Connecticut

Delaware

District of Columbia

Florida

Georgia

Hawaii

Idaho

Illinois

Indiana

Iowa

Kansas

Kentucky

Louisiana

Maine

Maryland

Massachusetts

Michigan

Minnesota

Mississippi

Missouri

Montana

Nebraska

Nevada

New Hampshire

New Jersey

New Mexico

New York

North Carolina

North Dakota

Ohio

Oklahoma

Oregon

Pennsylvania

Rhode Island

South Carolina

South Dakota

Tennessee

Texas

Utah

Vermont

Virginia

Washington

West Virginia

Wisconsin

Wyoming

8. In which Pennsylvania county(ies) do you practice? (**check all that apply**)

Adams

Allegheny

Armstrong

Beaver

Bedford Berks

Blair

Bradford

Bucks

Butler

Cambria

Cameron

Carbon

Centre

Chester

Clarion

Clearfield

Clinton

Columbia

Crawford

Cumberland

Dauphin

Delaware

Elk

Erie

Fayette

Forest

Franklin

Fulton

Greene

Huntingdon

Indiana

Jefferson

Juniata

Lackawanna

Lancaster

Lawrence

Lebanon

Lehigh

Luzerne

Lycoming

McKean

Mercer

Mifflin

Monroe

Montgomery

Montour

Northampton

Northumberland

Perry

Philadelphia

Pike

Potter

Schuylkill

Snyder

Somerset

Sullivan

Susquehanna

Tioga

Union

Venango

Warren

Washington

Wayne

Westmoreland

Wyoming

York

9. How many years have you been accredited in Pennsylvania?

<5

5-10

11-15

16-20

21-25

26-30

>30

Not accredited in PA

10. In what category are you accredited by the United States Department of Agriculture (USDA)?

Category I (authorized to perform accredited duties on canines, felines, amphibians/reptiles, furbearing animals, laboratory animals (rodents), and/or non-human primates)

Category II (authorized to perform accredited duties on all animals)

I don't know

Not accredited

11. Were Foreign Animal Diseases (FADs) covered in your formal veterinary education?

Yes

No

I don't know

12. Which of the following events have occurred in the United States in the last 15 years? (**check all that apply**)

Highly pathogenic avian influenza in California turkeys

Equine piroplasmosis in Texas horses

Foot and mouth disease on a Texas feedlot

New World screwworm larvae on a dog arriving from South America

Exotic Newcastle disease in California, Arizona, Nevada and Texas

Lumpy skin disease in Wisconsin cattle

13. How likely do you think it is for an FAD to be used as a weapon of bioterrorism?

Not likely

Somewhat likely

Likely

Very likely

14. How would you describe your FAD training? (**check all that apply**)

I have no FAD knowledge and have had no FAD training

No formal training, but I have read about FADs on my own (e.g., using texts or other resources)

Online courses about FAD concepts in general/specific disease(s) (e.g., course on avian influenza or course on foot and mouth disease)

Online USDA NAVP Modules on FADs

Courses offered in veterinary school covered FADs

Official FAD training at Plum Island

Other

15. How would you describe your comfort level in recognizing/diagnosing FADs overall?

Very comfortable

Somewhat comfortable

Not comfortable

16. How would you describe your comfort level in recognizing FADs for each of the following species?

Very comfortable Somewhat comfortable Not comfortable

Bovine

Equine

Caprine

Ovine

Porcine

Avian

Lagomorphs

17. During your career, approximately how many times have you identified and reported a potential FAD case?

0

1

2

3

4

5

>5

18. In the last 5 years, approximately how many times has an FAD been on your list of differential diagnoses?

0

1-4

5-10

11-15

16-20

>20

19. In which species have you identified potential FAD cases? (**check all that apply**)

Bovine

Equine

Caprine

Ovine

Porcine

Avian

Lagomorphs

None

20. With which FADs are you most familiar in regard to clinical signs, epidemiologic distribution, mode of transmission, and potential impact? (**check all that apply**)

None

African horse sickness

African swine fever

Bluetongue

Bovine babesiosis

Classical swine fever

Contagious bovine pleuropneumonia

Dourine

Epizootic hemorrhagic disease

Equine piroplasmosis

Foot and mouth disease

Glanders

Heartwater

Hemorrhagic septicemia

Highly pathogenic avian influenza

Japanese encephalitis

Lumpy skin disease

Malignant catarrhal fever

Newcastle disease

Peste des petits ruminants

Rabbit hemorrhagic disease

Rift Valley fever

Rinderpest

Screwworm (NWS and OWS)

Sheep pox and goat pox

Swine vesicular disease

Theilerosis

Trypanosomosis (Tsetse-transmitted)

Venezuelan equine encephalitis

Vesicular stomatitis

21. Which FADs would you like to know more about? (**check all that apply**)

African horse sickness

African swine fever

Bluetongue

Bovine babesiosis

Classical swine fever

Contagious bovine pleuropneumonia

Dourine

Epizootic hemorrhagic disease

Equine piroplasmosis

Foot and mouth disease

Glanders

Heartwater

Hemorrhagic septicemia

Highly pathogenic avian influenza

Japanese encephalitis

Lumpy skin disease

Malignant catarrhal fever

Newcastle disease

Peste des petits ruminants

Rabbit hemorrhagic disease

Rift Valley fever

Rinderpest

Screwworm (NWS and OWS)

Sheep pox and goat pox

Swine vesicular disease

Theilerosis

Trypanosomosis (Tsetse-transmitted)

Venezuelan equine encephalitis

Vesicular stomatitis

22. If confronted with a possible FAD, I know who to immediately contact.

Yes

No

Unsure

23. Please check the 5 FADs you believe pose the greatest threat to our nation’s animals and animal products. (**must select exactly 5**)

African horse sickness

African swine fever

Bluetongue

Bovine babesiosis

Classical swine fever

Contagious bovine pleuropneumonia

Dourine

Epizootic hemorrhagic disease

Equine piroplasmosis

Foot and mouth disease

Glanders

Heartwater

Hemorrhagic septicemia

Highly pathogenic avian influenza

Japanese encephalitis

Lumpy skin disease

Malignant catarrhal fever

Newcastle disease

Peste des petits ruminants

Rabbit hemorrhagic disease

Rift Valley fever

Rinderpest

Screwworm (NWS and OWS)

Sheep pox and goat pox

Swine vesicular disease

Theilerosis

Trypanosomosis (Tsetse-transmitted)

Venezuelan equine encephalitis

Vesicular stomatitis

24. Would you be interested in attending a one-day refresher course on FADs?

Yes

No

Unsure

25. Would you be more likely to attend a one-day refresher course on FADs if Continuing Education (CE) credit/hours were offered?

Yes

No

Doesn't matter

26. How many miles would you drive to attend a one-day refresher course on FADs?

<25

25-50

51-75

>75

27. On which day(s) of the week would you prefer attending a one-day refresher course on FADs? (**check all that apply**)

Sunday

Monday

Tuesday

Wednesday

Thursday

Friday

Saturday
